# Supplementary material for: Patterns of foot-and-mouth disease virus detection in environmental samples in an endemic setting
Source: Front Vet Sci. 2023 Jun 16;10:1157538. doi: 10.3389/fvets.2023.1157538 (PMC10312077; doi:10.3389/fvets.2023.1157538)
Supplement: Supplementary file 4 [file Data_Sheet_4.XLSX]

## Sheet: data_air
Date	Label	path	dist	Herd	LANAVET RT-PCR	CT Value	fm40	day	week	speed	Avetemp	AveRH
2016-08-24	G10013	HT	0	herd1	Pos	34.7363	1	1	week 1	1.41389	25.9083	76.2
2016-08-24	G10014	HT	50	herd1	Neg	Undeterminedd	0	1	week 1	1.41389	25.9083	76.2
2016-08-24	G10015	HT	75	herd1	Pos	29.6745	1	1	week 1	1.41389	25.9083	76.2
2016-08-24	G10016	HT	100	herd1	Pos	33.5598	1	1	week 1	1.41389	25.9083	76.2
2016-08-24	G10021	MT	0	herd1	Pos	31.1892	1	1	week 1	1.41389	25.9083	76.2
2016-08-24	G10022	MT	50	herd1	Pos	34.2002	1	1	week 1	1.41389	25.9083	76.2
2016-08-24	G10023	MT	75	herd1	Neg	Undeterminedd	0	1	week 1	1.41389	25.9083	76.2
2016-08-24	G10024	MT	100	herd1	Pos	38.1488	1	1	week 1	1.41389	25.9083	76.2
2016-08-24	G10029	NT	0	herd1	Pos	37.1019	1	1	week 1	1.41389	25.9083	76.2
2016-08-24	G10030	NT	50	herd1	Neg	Undeterminedd	0	1	week 1	1.41389	25.9083	76.2
2016-08-24	G10031	NT	75	herd1	Pos	35.4717	1	1	week 1	1.41389	25.9083	76.2
2016-08-24	G10032	NT	100	herd1	Pos	37.8407	1	1	week 1	1.41389	25.9083	76.2
2016-08-25	G10054	HT	0	herd3	Pos	35.8517	1	1	week 1	1.225	25.7139	75.5417
2016-08-25	G10055	HT	50	herd3	Neg	Undeterminedd	0	1	week 1	1.225	25.7139	75.5417
2016-08-25	G10056	HT	75	herd3	Neg	Undeterminedd	0	1	week 1	1.225	25.7139	75.5417
2016-08-25	G10057	HT	100	herd3	Pos	29.0911	1	1	week 1	1.225	25.7139	75.5417
2016-08-25	G10062	MT	0	herd3	Neg	Undeterminedd	0	1	week 1	1.225	25.7139	75.5417
2016-08-25	G10063	MT	50	herd3	Pos	38.2554	1	1	week 1	1.225	25.7139	75.5417
2016-08-25	G10064	MT	75	herd3	Neg	Undeterminedd	0	1	week 1	1.225	25.7139	75.5417
2016-08-25	G10065	MT	100	herd3	Pos	27.1746	1	1	week 1	1.225	25.7139	75.5417
2016-08-25	G10070	NT	0	herd3	Pos	27.1746	1	1	week 1	1.225	25.7139	75.5417
2016-08-25	G10071	NT	50	herd3	Pos	32.9887	1	1	week 1	1.225	25.7139	75.5417
2016-08-25	G10072	NT	75	herd3	Pos	27.8681	1	1	week 1	1.225	25.7139	75.5417
2016-08-25	G10073	NT	100	herd3	Neg	Undeterminedd	0	1	week 1	1.225	25.7139	75.5417
2016-08-26	G10094	HT	0	herd2	Neg	Undeterminedd	0	1	week 1	1.16111	24.2667	78.9583
2016-08-26	G10095	HT	50	herd2	Neg	Undeterminedd	0	1	week 1	1.16111	24.2667	78.9583
2016-08-26	G10096	HT	75	herd2	Neg	Undeterminedd	0	1	week 1	1.16111	24.2667	78.9583
2016-08-26	G10097	HT	100	herd2	Neg	Undeterminedd	0	1	week 1	1.16111	24.2667	78.9583
2016-08-26	G10109	MT	0	herd2	Neg	Undeterminedd	0	1	week 1	1.16111	24.2667	78.9583
2016-08-26	G10110	MT	50	herd2	Neg	Undeterminedd	0	1	week 1	1.16111	24.2667	78.9583
2016-08-26	G10111	MT	75	herd2	Neg	Undeterminedd	0	1	week 1	1.16111	24.2667	78.9583
2016-08-26	G10112	MT	100	herd2	Pos	35.8115	1	1	week 1	1.16111	24.2667	78.9583
2016-08-26	G10117	NT	0	herd2	Pos	37.0505	1	1	week 1	1.16111	24.2667	78.9583
2016-08-26	G10118	NT	50	herd2	Pos	37.0619	1	1	week 1	1.16111	24.2667	78.9583
2016-08-26	G10119	NT	75	herd2	Neg	Undeterminedd	0	1	week 1	1.16111	24.2667	78.9583
2016-08-26	G10120	NT	100	herd2	Neg	Undeterminedd	0	1	week 1	1.16111	24.2667	78.9583
2016-08-27	G10132	HT	0	herd1	Pos	35.2529	1	4	week 1	1.46944	24.6528	80.8028
2016-08-27	G10133	HT	50	herd1	Pos	38.1428	1	4	week 1	1.46944	24.6528	80.8028
2016-08-27	G10134	HT	75	herd1	Pos	37.2773	1	4	week 1	1.46944	24.6528	80.8028
2016-08-27	G10135	HT	100	herd1	Neg	Undeterminedd	0	4	week 1	1.46944	24.6528	80.8028
2016-08-27	G10140	MT	0	herd1	Pos	36.11	1	4	week 1	1.46944	24.6528	80.8028
2016-08-27	G10141	MT	50	herd1	Neg	Undeterminedd	0	4	week 1	1.46944	24.6528	80.8028
2016-08-27	G10142	MT	75	herd1	Pos	38.0671	1	4	week 1	1.46944	24.6528	80.8028
2016-08-27	G10143	MT	100	herd1	Neg	Undeterminedd	0	4	week 1	1.46944	24.6528	80.8028
2016-08-27	G10148	NT	0	herd1	Neg	Undeterminedd	0	4	week 1	1.46944	24.6528	80.8028
2016-08-27	G10149	NT	50	herd1	Neg	Undeterminedd	0	4	week 1	1.46944	24.6528	80.8028
2016-08-27	G10150	NT	75	herd1	Neg	Undeterminedd	0	4	week 1	1.46944	24.6528	80.8028
2016-08-27	G10151	NT	100	herd1	Neg	Undeterminedd	0	4	week 1	1.46944	24.6528	80.8028
2016-08-28	G10161	HT	0	herd3	Pos	38.3499	1	4	week 1	1.75833	24.8167	80.2583
2016-08-28	G10162	HT	50	herd3	Pos	38.035	1	4	week 1	1.75833	24.8167	80.2583
2016-08-28	G10163	HT	75	herd3	Pos	38.7621	1	4	week 1	1.75833	24.8167	80.2583
2016-08-28	G10164	HT	100	herd3	Neg	Undeterminedd	0	4	week 1	1.75833	24.8167	80.2583
2016-08-28	G10174	MT	0	herd3	Neg	Undeterminedd	0	4	week 1	1.75833	24.8167	80.2583
2016-08-28	G10175	MT	50	herd3	Neg	Undeterminedd	0	4	week 1	1.75833	24.8167	80.2583
2016-08-28	G10176	MT	75	herd3	Pos	29.9911	1	4	week 1	1.75833	24.8167	80.2583
2016-08-28	G10177	MT	100	herd3	Neg	Undeterminedd	0	4	week 1	1.75833	24.8167	80.2583
2016-08-28	G10182	NT	0	herd3	Neg	41.212	0	4	week 1	1.75833	24.8167	80.2583
2016-08-28	G10183	NT	50	herd3	Neg	Undeterminedd	0	4	week 1	1.75833	24.8167	80.2583
2016-08-28	G10184	NT	75	herd3	Pos	36.2351	1	4	week 1	1.75833	24.8167	80.2583
2016-08-28	G10185	NT	100	herd3	Pos	35.8029	1	4	week 1	1.75833	24.8167	80.2583
2016-08-29	G10199	MT	0	herd2	Neg	42.0455	0	4	week 1	1.48333	28.1667	61.3444
2016-08-29	G10200	MT	50	herd2	Neg	Undeterminedd	0	4	week 1	1.48333	28.1667	61.3444
2016-08-29	G10201	MT	75	herd2	Neg	Undeterminedd	0	4	week 1	1.48333	28.1667	61.3444
2016-08-29	G10202	MT	100	herd2	Neg	Undeterminedd	0	4	week 1	1.48333	28.1667	61.3444
2016-08-29	G10210	HT	0	herd2	Pos	32.4455	1	4	week 1	1.48333	28.1667	61.3444
2016-08-29	G10211	HT	50	herd2	Pos	33.233	1	4	week 1	1.48333	28.1667	61.3444
2016-08-29	G10212	HT	75	herd2	Neg	Undeterminedd	0	4	week 1	1.48333	28.1667	61.3444
2016-08-29	G10213	HT	100	herd2	Neg	Undeterminedd	0	4	week 1	1.48333	28.1667	61.3444
2016-08-29	G10218	NT	0	herd2	Pos	37.0675	1	4	week 1	1.48333	28.1667	61.3444
2016-08-29	G10219	NT	50	herd2	Neg	Undeterminedd	0	4	week 1	1.48333	28.1667	61.3444
2016-08-29	G10220	NT	75	herd2	Pos	37.3126	1	4	week 1	1.48333	28.1667	61.3444
2016-08-29	G10221	NT	100	herd2	Neg	Undeterminedd	0	4	week 1	1.48333	28.1667	61.3444
2016-10-24	G10232	HT	75	herd1	Neg	Undetermined	0	1	week 1	1.75833	29.6806	43.1
2016-10-24	G10233	HT	0	herd1	Neg	Undetermined	0	1	week 1	1.75833	29.6806	43.1
2016-10-24	G10234	HT	50	herd1	Neg	Undetermined	0	1	week 1	1.75833	29.6806	43.1
2016-10-24	G10235	HT	100	herd1	Neg	Undetermined	0	1	week 1	1.75833	29.6806	43.1
2016-10-24	G10254	MT	100	herd1	Neg	Undetermined	0	1	week 1	1.75833	29.6806	43.1
2016-10-24	G10255	MT	50	herd1	Neg	Undetermined	0	1	week 1	1.75833	29.6806	43.1
2016-10-24	G10256	MT	0	herd1	Neg	Undetermined	0	1	week 1	1.75833	29.6806	43.1
2016-10-24	G10257	MT	75	herd1	Neg	Undetermined	0	1	week 1	1.75833	29.6806	43.1
2016-10-25	G10264	HT	0	herd3	Neg	Undetermined	0	1	week 1	1.70278	30.8111	42.5722
2016-10-25	G10265	HT	50	herd3	Neg	Undetermined	0	1	week 1	1.70278	30.8111	42.5722
2016-10-25	G10266	HT	75	herd3	Neg	Undetermined	0	1	week 1	1.70278	30.8111	42.5722
2016-10-25	G10267	HT	100	herd3	Neg	Undetermined	0	1	week 1	1.70278	30.8111	42.5722
2016-10-25	G10268	MT	0	herd3	Neg	Undetermined	0	1	week 1	1.70278	30.8111	42.5722
2016-10-25	G10269	MT	100	herd3	Neg	Undetermined	0	1	week 1	1.70278	30.8111	42.5722
2016-10-25	G10270	MT	50	herd3	Pos	38.2562	1	1	week 1	1.70278	30.8111	42.5722
2016-10-25	G10271	MT	75	herd3	Neg	Undetermined	0	1	week 1	1.70278	30.8111	42.5722
2016-10-25	G10272	NT	100	herd3	Neg	Undetermined	0	1	week 1	1.70278	30.8111	42.5722
2016-10-25	G10273	NT	75	herd3	Neg	Undetermined	0	1	week 1	1.70278	30.8111	42.5722
2016-10-25	G10274	NT	0	herd3	Neg	Undetermined	0	1	week 1	1.70278	30.8111	42.5722
2016-10-25	G10276	NT	50	herd3	Neg	Undetermined	0	1	week 1	1.70278	30.8111	42.5722
2016-10-26	G10303	NT	75	herd2	Neg	Undetermined	0	1	week 1	1.19167	28.725	41.9861
2016-10-26	G10305	HT	75	herd2	Neg	Undetermined	0	1	week 1	1.19167	28.725	41.9861
2016-10-26	G10309	MT	75	herd2	Neg	Undetermined	0	1	week 1	1.19167	28.725	41.9861
2016-10-26	G10310	HT	100	herd2	Neg	Undetermined	0	1	week 1	1.19167	28.725	41.9861
2016-10-26	G10316	HT	0	herd2	Neg	Undetermined	0	1	week 1	1.19167	28.725	41.9861
2016-10-26	G10318	MT	100	herd2	Neg	Undetermined	0	1	week 1	1.19167	28.725	41.9861
2016-10-26	G10319	MT	50	herd2	Neg	Undetermined	0	1	week 1	1.19167	28.725	41.9861
2016-10-26	G10321	MT	0	herd2	Neg	Undetermined	0	1	week 1	1.19167	28.725	41.9861
2016-10-26	G10322	HT	50	herd2	Neg	Undetermined	0	1	week 1	1.19167	28.725	41.9861
2016-10-26	G10333	NT	50	herd2	Neg	Undetermined	0	1	week 1	1.19167	28.725	41.9861
2016-10-26	G10334	NT	0	herd2	Neg	Undetermined	0	1	week 1	1.19167	28.725	41.9861
2016-10-26	G10335	NT	100	herd2	Neg	Undetermined	0	1	week 1	1.19167	28.725	41.9861
2016-11-07	G10337	NT	0	herd1	Neg	Undetermined	0	14	week 2	2.0375	26.2625	42.8625
2016-11-07	G10338	NT	100	herd1	Neg	Undetermined	0	14	week 2	2.0375	26.2625	42.8625
2016-11-07	G10339	NT	75	herd1	Neg	Undetermined	0	14	week 2	2.0375	26.2625	42.8625
2016-11-07	G10340	MT	0	herd1	Pos	35.3318	1	14	week 2	2.0375	26.2625	42.8625
2016-11-07	G10341	NT	50	herd1	Neg	Undetermined	0	14	week 2	2.0375	26.2625	42.8625
2016-11-07	G10342	MT	100	herd1	Neg	Undetermined	0	14	week 2	2.0375	26.2625	42.8625
2016-11-07	G10343	HT	0	herd1	Neg	Undetermined	0	14	week 2	2.0375	26.2625	42.8625
2016-11-07	G10344	HT	100	herd1	Neg	Undetermined	0	14	week 2	2.0375	26.2625	42.8625
2016-11-07	G10345	HT	75	herd1	Neg	Undetermined	0	14	week 2	2.0375	26.2625	42.8625
2016-11-07	G10346	MT	75	herd1	Neg	Undetermined	0	14	week 2	2.0375	26.2625	42.8625
2016-11-07	G10347	HT	50	herd1	Pos	38.1436	1	14	week 2	2.0375	26.2625	42.8625
2016-11-07	G10348	MT	50	herd1	Neg	Undetermined	0	14	week 2	2.0375	26.2625	42.8625
2016-11-08	G10392	NT	0	herd3	Neg	Undetermined	0	14	week 2	1.14444	29.2889	39.5722
2016-11-08	G10393	MT	100	herd3	Neg	Undetermined	0	14	week 2	1.14444	29.2889	39.5722
2016-11-08	G10394	HT	0	herd3	Neg	Undetermined	0	14	week 2	1.14444	29.2889	39.5722
2016-11-08	G10395	HT	100	herd3	Neg	Undetermined	0	14	week 2	1.14444	29.2889	39.5722
2016-11-08	G10396	MT	0	herd3	Pos	35.6487	1	14	week 2	1.14444	29.2889	39.5722
2016-11-08	G10397	HT	75	herd3	Neg	Undetermined	0	14	week 2	1.14444	29.2889	39.5722
2016-11-08	G10398	NT	100	herd3	Pos	38.1861	1	14	week 2	1.14444	29.2889	39.5722
2016-11-08	G10399	NT	50	herd3	Neg	Undetermined	0	14	week 2	1.14444	29.2889	39.5722
2016-11-08	G10400	HT	50	herd3	Pos	38.0074	1	14	week 2	1.14444	29.2889	39.5722
2016-11-08	G10401	MT	75	herd3	Neg	Undetermined	0	14	week 2	1.14444	29.2889	39.5722
2016-11-08	G10402	MT	50	herd3	Neg	Undetermined	0	14	week 2	1.14444	29.2889	39.5722
2016-11-08	G10403	NT	75	herd3	Neg	Undetermined	0	14	week 2	1.14444	29.2889	39.5722
2016-11-12	G10423	HT	50	herd2	Neg	Undetermined	0	17	week 2	1.71389	28.4028	31.1806
2016-11-12	G10424	MT	100	herd2	Neg	Undetermined	0	17	week 2	1.71389	28.4028	31.1806
2016-11-12	G10425	NT	100	herd2	Neg	Undetermined	0	17	week 2	1.71389	28.4028	31.1806
2016-11-12	G10426	MT	50	herd2	Neg	Undetermined	0	17	week 2	1.71389	28.4028	31.1806
2016-11-12	G10427	NT	75	herd2	Neg	Undetermined	0	17	week 2	1.71389	28.4028	31.1806
2016-11-12	G10428	HT	100	herd2	Pos	33.3784	1	17	week 2	1.71389	28.4028	31.1806
2016-11-12	G10429	MT	75	herd2	Pos	36.9222	1	17	week 2	1.71389	28.4028	31.1806
2016-11-12	G10430	NT	0	herd2	Neg	Undetermined	0	17	week 2	1.71389	28.4028	31.1806
2016-11-12	G10431	NT	50	herd2	Neg	Undetermined	0	17	week 2	1.71389	28.4028	31.1806
2016-11-12	G10432	MT	0	herd2	Neg	Undetermined	0	17	week 2	1.71389	28.4028	31.1806
2016-11-12	G10433	HT	75	herd2	Neg	Undetermined	0	17	week 2	1.71389	28.4028	31.1806
2016-11-12	G10434	HT	0	herd2	Neg	Undetermined	0	17	week 2	1.71389	28.4028	31.1806
2016-11-14	G10440	MT	50	herd1	Neg	Undetermined	0	20	week 3	1.29722	30.5778	34.0667
2016-11-14	G10441	MT	75	herd1	Neg	Undetermined	0	20	week 3	1.29722	30.5778	34.0667
2016-11-14	G10452	MT	50	herd1	Neg	Undetermined	0	20	week 3	1.29722	30.5778	34.0667
2016-11-14	G10454	MT	100	herd1	Neg	Undetermined	0	20	week 3	1.29722	30.5778	34.0667
2016-11-14	G10459	NT	0	herd1	Neg	Undetermined	0	20	week 3	1.29722	30.5778	34.0667
2016-11-14	G10462	NT	100	herd1	Neg	Undetermined	0	20	week 3	1.29722	30.5778	34.0667
2016-11-15	G10474	HT	0	herd3	Neg	Undetermined	0	20	week 3	1.45	29.7111	31.6833
2016-11-15	G10475	HT	50	herd3	Neg	Undetermined	0	20	week 3	1.45	29.7111	31.6833
2016-11-15	G10476	HT	75	herd3	Neg	Undetermined	0	20	week 3	1.45	29.7111	31.6833
2016-11-15	G10477	HT	100	herd3	Neg	Undetermined	0	20	week 3	1.45	29.7111	31.6833
2016-11-15	G10482	MT	0	herd3	Neg	Undetermined	0	20	week 3	1.45	29.7111	31.6833
2016-11-15	G10483	MT	50	herd3	Neg	Undetermined	0	20	week 3	1.45	29.7111	31.6833
2016-11-15	G10484	MT	75	herd3	Pos	37.8497	1	20	week 3	1.45	29.7111	31.6833
2016-11-15	G10485	MT	100	herd3	Neg	Undetermined	0	20	week 3	1.45	29.7111	31.6833
2016-11-15	G10490	NT	0	herd3	Neg	Undetermined	0	20	week 3	1.45	29.7111	31.6833
2016-11-15	G10491	NT	50	herd3	Neg	Undetermined	0	20	week 3	1.45	29.7111	31.6833
2016-11-15	G10492	NT	75	herd3	Neg	Undetermined	0	20	week 3	1.45	29.7111	31.6833
2016-11-15	G10493	NT	100	herd3	Neg	Undetermined	0	20	week 3	1.45	29.7111	31.6833
2016-11-16	G10511	HT	0	herd2	Neg	Undetermined	0	21	week 3	0.797222	31.25	33.3889
2016-11-16	G10512	HT	50	herd2	Neg	Undetermined	0	21	week 3	0.797222	31.25	33.3889
2016-11-16	G10513	HT	75	herd2	Neg	Undetermined	0	21	week 3	0.797222	31.25	33.3889
2016-11-16	G10514	HT	100	herd2	Neg	Undetermined	0	21	week 3	0.797222	31.25	33.3889
2016-11-16	G10515	MT	0	herd2	Neg	Undetermined	0	21	week 3	0.797222	31.25	33.3889
2016-11-16	G10516	MT	50	herd2	Neg	Undetermined	0	21	week 3	0.797222	31.25	33.3889
2016-11-16	G10517	MT	75	herd2	Neg	Undetermined	0	21	week 3	0.797222	31.25	33.3889
2016-11-16	G10518	MT	100	herd2	Neg	Undetermined	0	21	week 3	0.797222	31.25	33.3889
2016-11-16	G10523	NT	0	herd2	Neg	Undetermined	0	21	week 3	0.797222	31.25	33.3889
2016-11-16	G10524	NT	50	herd2	Neg	Undetermined	0	21	week 3	0.797222	31.25	33.3889
2016-11-16	G10525	NT	75	herd2	Neg	Undetermined	0	21	week 3	0.797222	31.25	33.3889
2016-11-16	G10526	NT	100	herd2	Neg	Undetermined	0	21	week 3	0.797222	31.25	33.3889
2016-11-24	G10533	HT	0	herd3	Neg	Undetermined	0	29	week 4	1.16944	31.8764	32.1292
2016-11-24	G10534	HT	50	herd3	Neg	Undetermined	0	29	week 4	1.16944	31.8764	32.1292
2016-11-24	G10535	HT	75	herd3	Neg	Undetermined	0	29	week 4	1.16944	31.8764	32.1292
2016-11-24	G10536	HT	100	herd3	Neg	Undetermined	0	29	week 4	1.16944	31.8764	32.1292
2016-11-24	G10537	NT	0	herd3	Neg	Undetermined	0	29	week 4	1.16944	31.8764	32.1292
2016-11-24	G10538	NT	50	herd3	Neg	Undetermined	0	29	week 4	1.16944	31.8764	32.1292
2016-11-24	G10539	NT	75	herd3	Neg	Undetermined	0	29	week 4	1.16944	31.8764	32.1292
2016-11-24	G10540	NT	100	herd3	Pos	38.2631	1	29	week 4	1.16944	31.8764	32.1292
2016-11-24	G10562	MT	0	herd3	Neg	Undetermined	0	29	week 4	1.16944	31.8764	32.1292
2016-11-24	G10563	MT	50	herd3	Neg	Undetermined	0	29	week 4	1.16944	31.8764	32.1292
2016-11-24	G10564	MT	75	herd3	Pos	38.2888	1	29	week 4	1.16944	31.8764	32.1292
2016-11-24	G10565	MT	100	herd3	Neg	Undetermined	0	29	week 4	1.16944	31.8764	32.1292
